# Supplementary material
Source: Springer Nature journal article supplement (https://www.springermedizin.de/resource/supplementary/12931_2013_1472_MOESM7_ESM.pdf/9426242)

A.

HLF LacZ

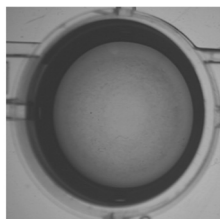

HLF CA-AKT

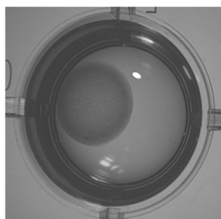

C.

HLF LacZ

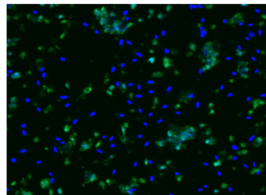

HLF CA-AKT

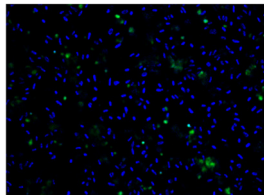

B.

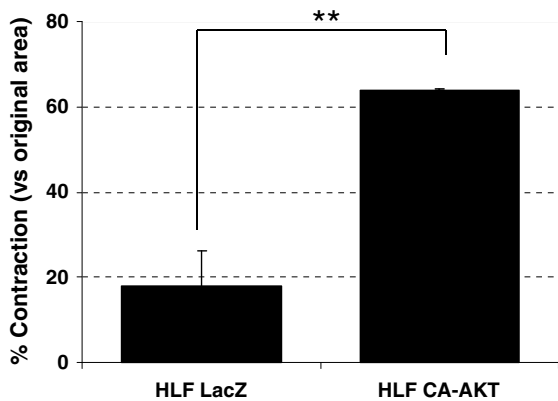

D.

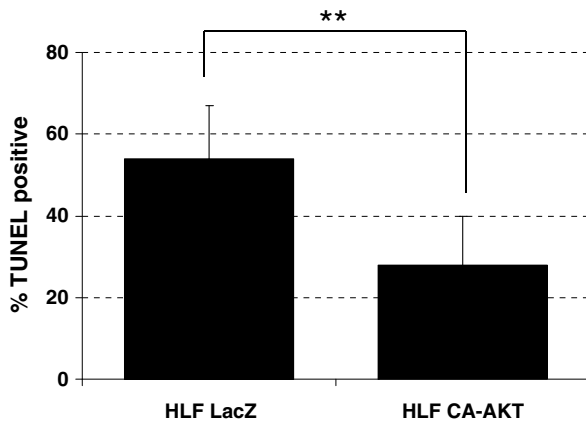

Supplement: MOESM7 [file 9426242]
